# Supplementary material for: Augmenting medical visual question answering with mixup, label smoothing, and layer-wise relevance propagation eXplainable Artificial Intelligence
Source: PeerJ journal article supplement (doi:10.7717/peerj-cs.3407), 2026-01-05
Supplement: Code_Description.pdf [file Code_Description.pdf]

# CODE DESCRIPTION

## Medical Visual Question Answering (MVQA)

Medical Visual Question Answering (MVQA) is a multidisciplinary field combining computer vision and natural language processing to interpret visual data and respond to related questions in natural language. The MVQA focuses on analyzing medical images (e.g., X-rays, CT scans, MRI scans) and providing relevant answers to queries posed by medical practitioners or researchers. This capability aims to assist in diagnosis, decision-making, and streamlining workflows in clinical environments.

## Fetch required inputs from the datasets

The MVQA dataset is divided into three subsets: training, validation, and test. Each subset consists of medical images paired with corresponding Question-Answer Pairs (QA-Pairs). The preparation of these inputs and computation of their required values is facilitated by the *data\_utils.py* script.

Two key issues arise within the QA-Pairs and images:

1. **Imbalanced Labels:** Certain labels have disproportionately large or small sample sizes.
2. **Insufficient Samples:** Some answers have very few associated samples, affecting representativeness.

These challenges are addressed through two processes:

1. **Improvement of QA-Pairs:** Balancing and augmenting QA-Pair labels to ensure better distribution.
2. **Improvement of Medical Images:** Enhancing the dataset by increasing the sample representativeness of underrepresented labels.

Finally, the improved QA-Pairs and medical images are concatenated based on their `image_id`, resulting in an enhanced and balanced dataset ready for model training and evaluation.

## Improvement of QA-Pairs

This module addresses the two primary issues in the dataset through the following steps:

### Resolving the First Issue (Imbalanced Labels)

1. **Computation of Question Counts:** Calculate the number of questions associated with each label.
2. **Hard-Sample Threshold Calculation:** Determine a threshold value to identify underrepresented labels (hard samples).
3. **Selection of an Average Value:** Choose an appropriate average value to guide balancing efforts.

## Resolving the Second Issue (Insufficient Samples)

New samples are generated for underrepresented labels based on the computed hard-sample threshold, ensuring a more balanced distribution across the dataset.

These steps collectively improve the quality and representativeness of the QA-Pairs and associated labels, contributing to a more robust dataset for model training and evaluation.

## Improvement of Medical Images

This module addresses the dataset's key issues through the following approaches:

### Resolving the First Issue (Imbalanced Labels)

1. **Image Count per Label:** Calculate the number of images associated with each label to identify imbalances.
2. **Hard-Sample Threshold:** Determine a threshold value to identify underrepresented labels.
3. **Average Value Selection:** Select an appropriate average value to guide the balancing process.

### Resolving the Second Issue (Insufficient Samples)

The second issue is addressed using:

1. **Mixup:** A data augmentation technique that generates new samples by combining pairs of images and their labels, enhancing diversity.
2. **Label Smoothing:** Regularizing the labels to reduce overconfidence in the model and improve generalization.

These methods collectively enhance the dataset's balance and quality, ensuring a more effective training process.

## MVQA Model Creation

From the improved dataset, features are extracted and combined to build the model.

### 1. Feature Extraction

- **Image Features:** Medical images are preprocessed, and features are extracted using VGGNet. These features are stored in separate files for training, validation, and testing: *train\_features.pkl*, *valid\_features.pkl*, and *test\_features.pkl*.
- **Text Features:** Word embeddings for QA-pairs are generated using GloVe vectors (stored in the "Glove" folder). Using these embeddings, LSTM generates a sequence of words for the answers based on the timestamps.

### 2. Feature Combination

The extracted image features and text features are concatenated using LSTM to form a unified representation.

### 3. Model Generation and Prediction

A model is trained using the concatenated feature vectors. This trained model is then used to predict answers for the test set.

#### 4. Validation

The predicted answers are evaluated using quantitative metrics to measure the model's performance.

## Layerwise Relevance Propagation eXplainable Artificial Intelligence (LRP XAI)

The reasoning behind the generated answers is visualized using Layer-wise Relevance Propagation (LRP) Explainable AI (XAI). The process involves:

### 1. Heatmap Generation

- Gradients are computed between the most contributing layer in the model and the final output layer.
- These gradients are used to create a heatmap that highlights the regions in the input contributing most to the model's decision.

### 2. Superimposed Images

- The heatmap is overlaid on the input image to visualize significant regions, resulting in superimposed images.
- Examples of these visualizations for samples from the Path-VQA dataset under various scenarios are shown in *Figs. 1 and 2*.

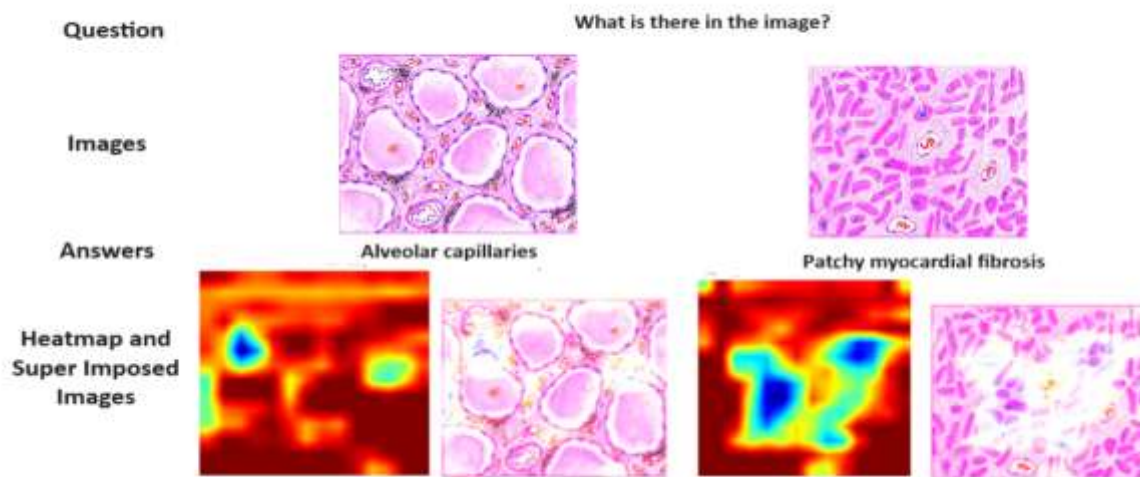

**Fig 1. Visualization of heatmaps and super imposed images for different samples**

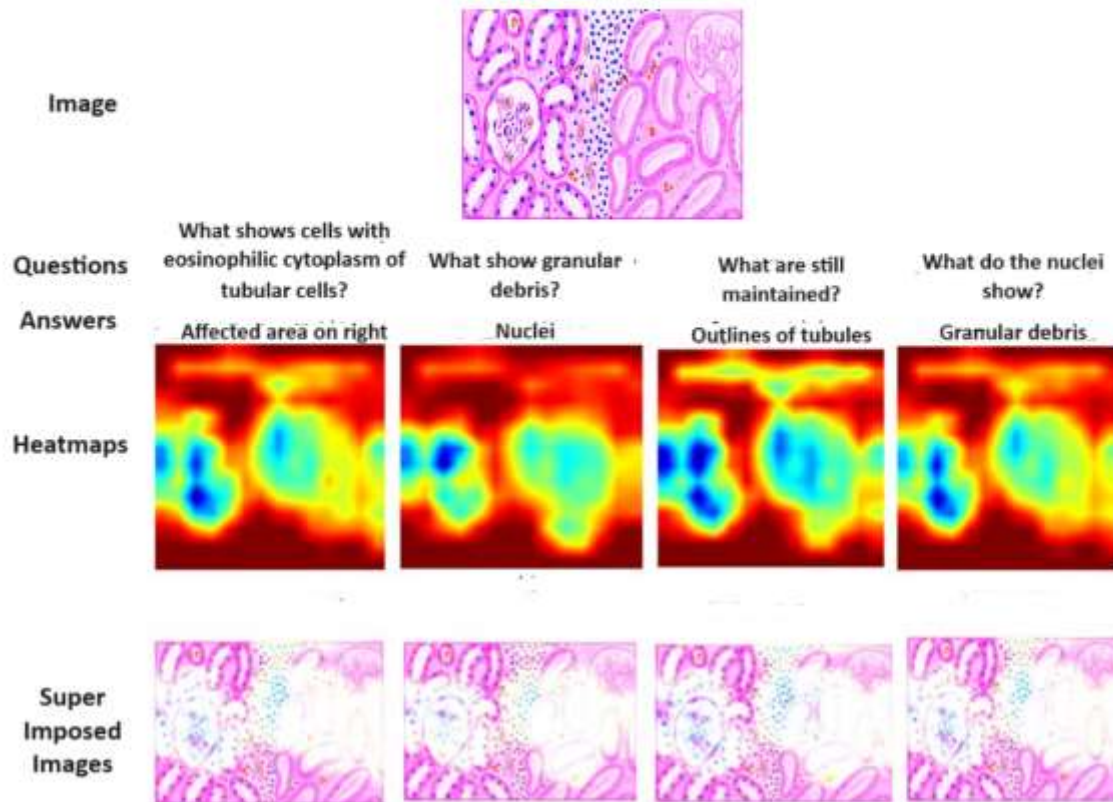

**Fig 2. Visualization of heatmaps and super imposed images for four different QA pairs**

### 3. Effect of Augmentation and Visualization

- The correctly and incorrectly classified samples from five MVQA datasets are analyzed.
- **Figs. 3 to 7** showcase the impact of data augmentation and visualization techniques on answer prediction accuracy.

This visualization approach provides insights into the model's decision-making process, enhancing interpretability and understanding of its predictions.

| Correctly Classified Samples |                                                                                   |                                                                                   |                                                                                   | Wrongly Classified Samples                                                          |                                                                                     |
|------------------------------|-----------------------------------------------------------------------------------|-----------------------------------------------------------------------------------|-----------------------------------------------------------------------------------|-------------------------------------------------------------------------------------|-------------------------------------------------------------------------------------|
| Image                        |  |  |  |  |  |
| Question                     | What does a ct scan of the abdomen show?                                          | What does mri demonstrate?                                                        | What is most alarming about this x-ray?                                           | What does ct show?                                                                  | What shows narrowing of the svc?                                                    |
| Expected Answer              | Multiple low density lesions on the spleen and liver                              | Tuberculoma                                                                       | Radial head fracture                                                              | Localisation of drain that migrated in right iliac fossa                            | Contrast of the chest                                                               |
| Predicted Answer (BDI)       | Non enhancing lesion                                                              | Tuberculoma                                                                       | Radial head fracture                                                              | Two enlarged nodes                                                                  | CT scan of chest                                                                    |
| Predicted Answer (ADI)       | Multiple low density lesions on the spleen and liver                              | Tuberculoma                                                                       | Radial head fracture                                                              | Meningioma fossa                                                                    | Lesion                                                                              |
| Generated XAI Output         |  |  |  |  |  |
|                              | (a)                                                                               | (b)                                                                               | (c)                                                                               | (d)                                                                                 | (e)                                                                                 |

Fig 3. Visualization of samples from VQA-MED 2018 dataset w.r.t predicted answer

| Correctly Classified Samples |                                                                                     |                                                                                     |                                                                                     | Wrongly Classified Samples                                                            |                                                                                       |
|------------------------------|-------------------------------------------------------------------------------------|-------------------------------------------------------------------------------------|-------------------------------------------------------------------------------------|---------------------------------------------------------------------------------------|---------------------------------------------------------------------------------------|
| Image                        |   |   |  |   |  |
| Question                     | What type of contrast did this patient have?                                        | What imaging modality is used?                                                      | Which plane is this ct scan taken in?                                               | What is the primary abnormality in this image?                                        | What organ system is displayed in this mri?                                           |
| Expected Answer              | GI and IV                                                                           | XR- Plain film                                                                      | Coronal                                                                             | Plantar fibromatosis                                                                  | Heart and great vessels                                                               |
| Predicted Answer (BDI)       | Upper GI                                                                            | XR- Plain film                                                                      | Coronal                                                                             | Primary intraocular lymphoma                                                          | Lung, mediastinum, pleura                                                             |
| Predicted Answer (ADI)       | GI and IV                                                                           | XR- Plain film                                                                      | Coronal                                                                             | Bone Cyst                                                                             | Lung, mediastinum, pleura                                                             |
| Generated XAI Output         |  |  |  |  |  |
|                              | (a)                                                                                 | (b)                                                                                 | (c)                                                                                 | (d)                                                                                   | (e)                                                                                   |

Fig 4. Visualization of samples from VQA-MED 2019 dataset w.r.t predicted answer



| Correctly Classified Samples |                                                                                   |                                                                                   |                                                                                   | Wrongly Classified Samples                                                          |                                                                                     |
|------------------------------|-----------------------------------------------------------------------------------|-----------------------------------------------------------------------------------|-----------------------------------------------------------------------------------|-------------------------------------------------------------------------------------|-------------------------------------------------------------------------------------|
| Image                        | 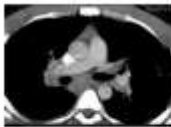 |  |  |  |  |
| Question                     | What is abnormal in the ct scan?                                                  | What abnormality is seen in the image?                                            | What is abnormal in the ct scan?                                                  | What is abnormal in the mri?                                                        | What abnormality is seen in the image?                                              |
| Expected Answer              | Sarcoid                                                                           | Abdominal abscess                                                                 | Pulmonary embolism                                                                | Aneurysmal bone cyst                                                                | Stress fracture                                                                     |
| Predicted Answer (BDI)       | Empyema                                                                           | Abdominal abscess                                                                 | Pulmonary embolism                                                                | Osteoporosis                                                                        | Enchodroma                                                                          |
| Predicted Answer (ADI)       | Sarcoid                                                                           | Abdominal abscess                                                                 | Pulmonary embolism                                                                | Osteoporosis                                                                        | Lisfranc fracture-dislocation                                                       |
| Generated XAI Output         |  |  |  |  |  |
|                              | (a)                                                                               | (b)                                                                               | (c)                                                                               | (d)                                                                                 | (e)                                                                                 |

Fig 5. Visualization of samples from VQA-MED 2020 dataset w.r.t predicted answer

| Correctly Classified Samples |                                                                                     |                                                                                     |                                                                                     | Wrongly Classified Samples                                                            |                                                                                       |
|------------------------------|-------------------------------------------------------------------------------------|-------------------------------------------------------------------------------------|-------------------------------------------------------------------------------------|---------------------------------------------------------------------------------------|---------------------------------------------------------------------------------------|
| Image                        |  |  |  |  |  |
| Question                     | What is most alarming about this x-ray?                                             | What is the primary abnormality in this image?                                      | What is most alarming about this x-ray?                                             | What is abnormal in the x-ray?                                                        | What is the primary abnormality in this image?                                        |
| Expected Answer              | Osteochondroma                                                                      | Osteosarcoma                                                                        | Radial head fracture                                                                | Chondrocalcinosis                                                                     | Osteochondroma                                                                        |
| Predicted Answer (BDI)       | Osteochondroma                                                                      | Osteochondroma                                                                      | Osteosarcoma                                                                        | Osteosarcoma                                                                          | Page's disease                                                                        |
| Predicted Answer (ADI)       | Osteochondroma                                                                      | Osteosarcoma                                                                        | Radial head fracture                                                                | Osteosarcoma                                                                          | Fat necrosis                                                                          |
| Generated XAI Output         |  |  |  |  |  |
|                              | (a)                                                                                 | (b)                                                                                 | (c)                                                                                 | (d)                                                                                   | (e)                                                                                   |

Fig 6. Visualization of samples from VQA-MED 2021 dataset w.r.t predicted answer

| Correctly Classified Samples |                                                                                   |                                                                                   |                                                                                   | Wrongly Classified Samples                                                          |                                                                                     |
|------------------------------|-----------------------------------------------------------------------------------|-----------------------------------------------------------------------------------|-----------------------------------------------------------------------------------|-------------------------------------------------------------------------------------|-------------------------------------------------------------------------------------|
| Image                        |  |  |  |  |  |
| Question                     | Are the nuclei of affected tubules pale ?                                         | What show multiple small vacuoles in the cytoplasm microvesicles ?                | What are congested ?                                                              | What is there increased in the red pulp, capsule and the trabeculae ?               | What are the atypical dysplastic squamous cells confined to ?                       |
| Expected Answer              | Yes                                                                               | Hepatocytes                                                                       | Alveolar capillaries                                                              | Fibrosis trabeculae                                                                 | Layers of mucosa                                                                    |
| Predicted Answer (BDI)       | No                                                                                | Hepatocytes                                                                       | Alveolar capillaries                                                              | Sinuses                                                                             | Cytoplasm                                                                           |
| Predicted Answer (ADI)       | Yes                                                                               | Hepatocytes                                                                       | Alveolar capillaries                                                              | Acute inflammatory                                                                  | Cytoplasm                                                                           |
| Generated XAI Output         |  |  |  |  |  |
|                              | (a)                                                                               | (b)                                                                               | (c)                                                                               | (d)                                                                                 | (e)                                                                                 |

Fig 7. Visualization of samples from Path-VQA dataset w.r.t predicted answer
