# Supplementary material for: Augmenting medical visual question answering with mixup, label smoothing, and layer-wise relevance propagation eXplainable Artificial Intelligence
Source: PeerJ journal article supplement (doi:10.7717/peerj-cs.3407), 2026-01-05
Supplement: Readme.pdf [file Readme.pdf]

# How to run

Download the python file and installation requirement from

<https://doi.org/10.5281/zenodo.15910715>.

Download the datasets from <https://figshare.com/account/articles/29643236> and

<https://zenodo.org/records/10499039>

Run it in any Integrated Development Environment or terminal in Ubuntu/Liunx.

## Demo

We further provide some of the sample inputs and outputs of the model. Inputs are the natural language questions about the images, and answers are the medical diseases (especially from VQA-MED 2021 dataset). Some of the answers are consistent with the ground truth, while others are not.

### VQA-MED 2018 dataset

| Correctly Classified Samples |                                                                                     |                                                                                     |                                                                                     | Wrongly Classified Samples                                                           |                                                                                       |
|------------------------------|-------------------------------------------------------------------------------------|-------------------------------------------------------------------------------------|-------------------------------------------------------------------------------------|--------------------------------------------------------------------------------------|---------------------------------------------------------------------------------------|
| Image                        | 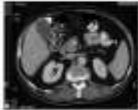  |   |   |   |   |
| Question                     | What does a ct scan of the abdomen show?                                            | What does mri demonstrate?                                                          | What is most alarming about this x-ray?                                             | What does ct show?                                                                   | What shows narrowing of the svc?                                                      |
| Expected Answer              | Multiple low density lesions on the spleen and liver                                | Tuberculoma                                                                         | Radial head fracture                                                                | Localisation of drain that migrated in right iliac fossa                             | Contrast of the chest                                                                 |
| Predicted Answer (BDI)       | Non enhancing lesion                                                                | Tuberculoma                                                                         | Radial head fracture                                                                | Two enlarged nodes                                                                   | CT scan of chest                                                                      |
| Predicted Answer (ADI)       | Multiple low density lesions on the spleen and liver                                | Tuberculoma                                                                         | Radial head fracture                                                                | Meningioma fossa                                                                     | Lesion                                                                                |
| Generated XAI Output         |  |  |  |  |  |
|                              | (a)                                                                                 | (b)                                                                                 | (c)                                                                                 | (d)                                                                                  | (e)                                                                                   |

### VQA-MED 2019 dataset

| Correctly Classified Samples |                                                                                     |                                                                                     |                                                                                     | Wrongly Classified Samples                                                           |                                                                                       |
|------------------------------|-------------------------------------------------------------------------------------|-------------------------------------------------------------------------------------|-------------------------------------------------------------------------------------|--------------------------------------------------------------------------------------|---------------------------------------------------------------------------------------|
| Image                        | 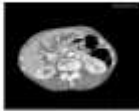 |  |  |  |  |
| Question                     | What type of contrast did this patient have?                                        | What imaging modality is used?                                                      | Which plane is this ct scan taken in?                                               | What is the primary abnormality in this image?                                       | What organ system is displayed in this mri?                                           |
| Expected Answer              | Git and IV                                                                          | XR- Plain film                                                                      | Coronal                                                                             | Plantar fibromatosis                                                                 | Heart and great vessels                                                               |
| Predicted Answer (BDI)       | Upper Git                                                                           | XR- Plain film                                                                      | Coronal                                                                             | Primary intraocular lymphoma                                                         | Lung, mediastinum pleura                                                              |
| Predicted Answer (ADI)       | Git and IV                                                                          | XR- Plain film                                                                      | Coronal                                                                             | Bone Cyst                                                                            | Lung, mediastinum pleura                                                              |
| Generated XAI Output         |  |  |  |  |  |
|                              | (a)                                                                                 | (b)                                                                                 | (c)                                                                                 | (d)                                                                                  | (e)                                                                                   |

## VQA-MED 2020 dataset

|                        | Correctly Classified Samples                                                      |                                                                                   |                                                                                   | Wrongly Classified Samples                                                         |                                                                                     |
|------------------------|-----------------------------------------------------------------------------------|-----------------------------------------------------------------------------------|-----------------------------------------------------------------------------------|------------------------------------------------------------------------------------|-------------------------------------------------------------------------------------|
| Image                  | 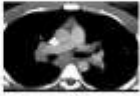 |  |  |  |  |
| Question               | What is abnormal in the ct scan?                                                  | What abnormality is seen in the image?                                            | What is abnormal in the ct scan?                                                  | What is abnormal in the mri?                                                       | What abnormality is seen in the image?                                              |
| Expected Answer        | Sarcoid                                                                           | Abdominal abscess                                                                 | Pulmonary embolism                                                                | Aneurysmal bone cyst                                                               | Stress fracture                                                                     |
| Predicted Answer (BDI) | Emphyema                                                                          | Abdominal abscess                                                                 | Pulmonary embolism                                                                | Osteoporosis                                                                       | Enchondroma                                                                         |
| Predicted Answer (ADI) | Sarcoid                                                                           | Abdominal abscess                                                                 | Pulmonary embolism                                                                | Osteoporosis                                                                       | Lisfranc fracture-dislocation                                                       |
| Generated XAI Output   |  |  |  |  |  |
|                        | (a)                                                                               | (b)                                                                               | (c)                                                                               | (d)                                                                                | (e)                                                                                 |

## VQA-MED 2021 dataset

|                        | Correctly Classified Samples                                                        |                                                                                     |                                                                                     | Wrongly Classified Samples                                                           |                                                                                       |
|------------------------|-------------------------------------------------------------------------------------|-------------------------------------------------------------------------------------|-------------------------------------------------------------------------------------|--------------------------------------------------------------------------------------|---------------------------------------------------------------------------------------|
| Image                  |   |   |   |   |   |
| Question               | What is most alarming about this x-ray?                                             | What is the primary abnormality in this image?                                      | What is most alarming about this x-ray?                                             | What is abnormal in the x-ray?                                                       | What is the primary abnormality in this image?                                        |
| Expected Answer        | Osteochondroma                                                                      | Osteosarcoma                                                                        | Radial head fracture                                                                | Chondrocalcinosis                                                                    | Osteochondroma                                                                        |
| Predicted Answer (BDI) | Osteochondroma                                                                      | Osteochondroma                                                                      | Osteosarcoma                                                                        | Osteosarcoma                                                                         | Paget's disease                                                                       |
| Predicted Answer (ADI) | Osteochondroma                                                                      | Osteosarcoma                                                                        | Radial head fracture                                                                | Osteosarcoma                                                                         | Fat necrosis                                                                          |
| Generated XAI Output   |  |  |  |  |  |
|                        | (a)                                                                                 | (b)                                                                                 | (c)                                                                                 | (d)                                                                                  | (e)                                                                                   |

## Path-VQA dataset

|                        | Correctly Classified Samples                                                      |                                                                                   |                                                                                   | Wrongly Classified Samples                                                          |                                                                                     |
|------------------------|-----------------------------------------------------------------------------------|-----------------------------------------------------------------------------------|-----------------------------------------------------------------------------------|-------------------------------------------------------------------------------------|-------------------------------------------------------------------------------------|
| Image                  |  |  |  |  |  |
| Question               | Are the nuclei of affected tubules pale ?                                         | What show multiple small vacuoles in the cytoplasm microvesicles ?                | What are congested ?                                                              | What is there increased in the red pulp, capsule and the trabeculae ?               | What are the atypical dysplastic squamous cells confined to ?                       |
| Expected Answer        | Yes                                                                               | Hepatocytes                                                                       | Alveolar capillaries                                                              | Fibrosis trabeculae                                                                 | Layers of mucosa                                                                    |
| Predicted Answer (BDI) | No                                                                                | Hepatocytes                                                                       | Alveolar capillaries                                                              | Sinuses                                                                             | Cytoplasm                                                                           |
| Predicted Answer (ADI) | Yes                                                                               | Hepatocytes                                                                       | Alveolar capillaries                                                              | Acute Inflammatory                                                                  | Cytoplasm                                                                           |
| Generated XAI Output   |  |  |  |  |  |
|                        | (a)                                                                               | (b)                                                                               | (c)                                                                               | (d)                                                                                 | (e)                                                                                 |

## Datasets

VQA-MED 2018, 2020, 2021 and Path-VQA: <https://figshare.com/account/articles/29643236>

VQA-MED 2019: <https://zenodo.org/records/10499039>
